# Supplementary material
Source: PubMed Central journal article supplement (PMC8009856)
Supplement: NIHMS1674170-supplement-1.pdf [file NIHMS1674170-supplement-1.pdf]

## **Supporting Information**

### **Sirtuin 6 (SIRT6) regulates redox homeostasis and downstream signaling events in human articular chondrocytes**

John A. Collins, Maryna Kapustina, Jesalyn A. Bolduc, James F.W. Pike, Brian O. Diekman, Kimberlee Mix, Susan Chubinskaya, Emrah Eroglu, Thomas Michel, Leslie B. Poole, Cristina M. Furdul, Richard F. Loeser.

#### **Material Included**

Supplementary Figure 1. Validation of the NLS-HyPer-DAAO measurement of H<sub>2</sub>O<sub>2</sub>.

Supplementary Figure 2. Identification of nuclear ROI using CellProfiler software for subsequent measurement of fluorescence intensity and determination of H<sub>2</sub>O<sub>2</sub> generation.

Supplementary Figure 3. Expression and nuclear localization of NLS-HyPer-DAAO.

**Supplementary Figure 1.**

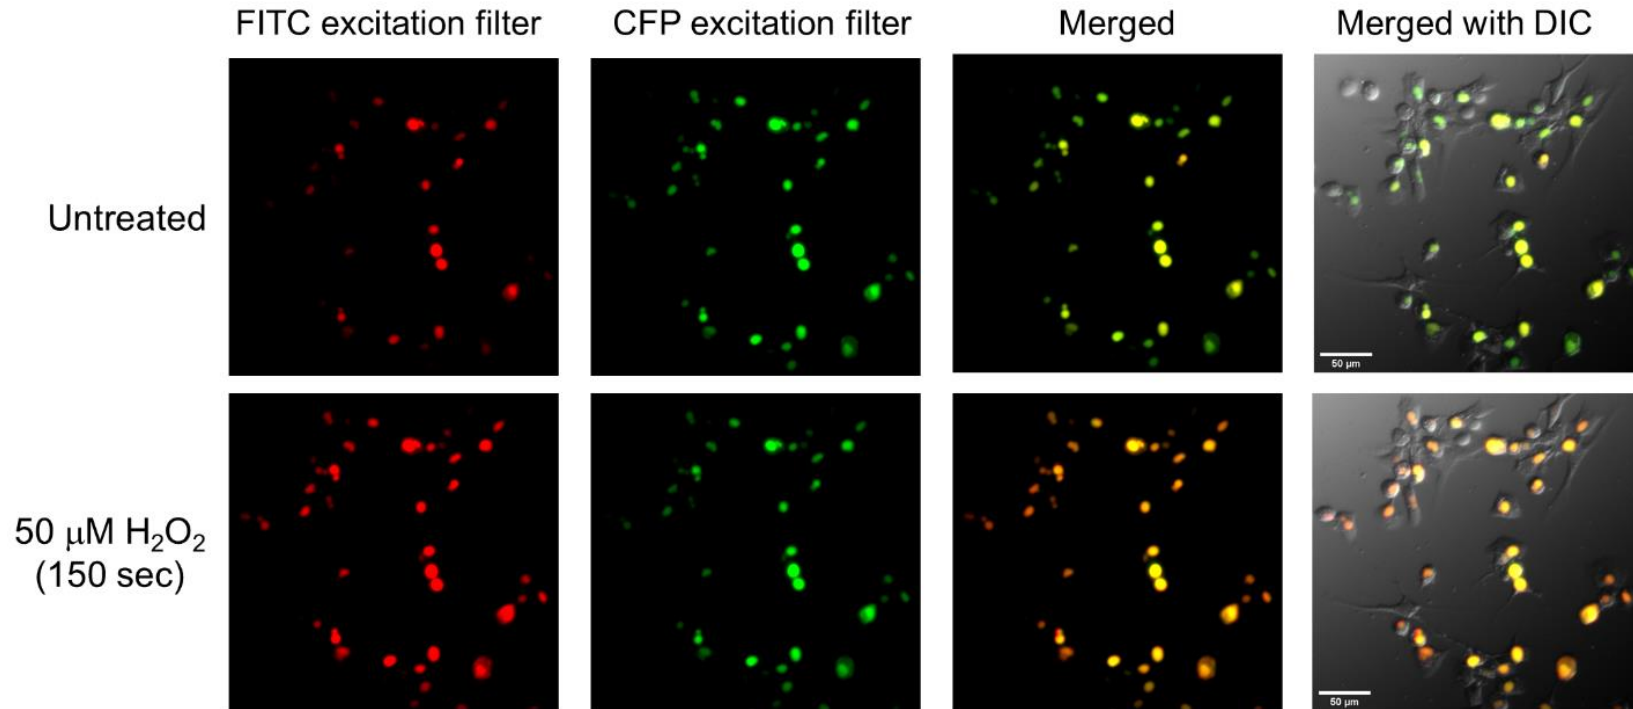

**Supplementary Figure 1. Validation of the NLS-HyPer-DAAO measurement of H<sub>2</sub>O<sub>2</sub>.** Human chondrocytes were transduced with NLS-HyPer-DAAO for 48 hours and then treated with 50 μM H<sub>2</sub>O<sub>2</sub>. An increase in fluorescence emission intensity with FITC excitation filter (red), which is most notable on the merged image, demonstrates that the HyPer probe is oxidized in response to exogenously added H<sub>2</sub>O<sub>2</sub>.

**Supplementary Figure 2.**

Nuclear fluorescence  
signal (CFP)

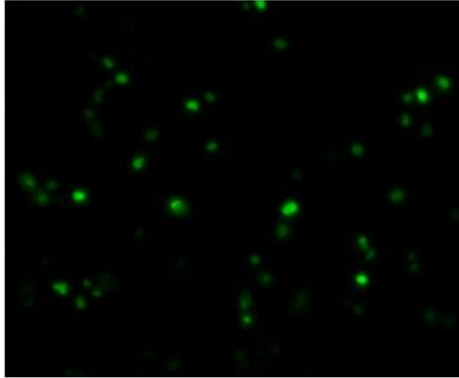

Nuclear fluorescence  
signal merged with DIC

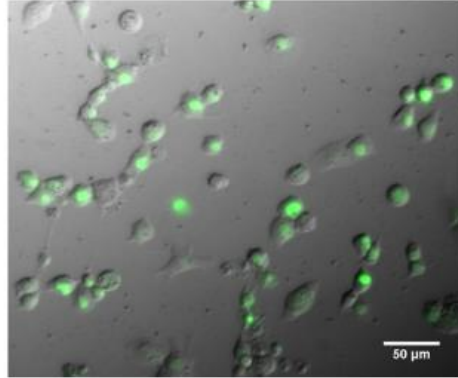

Identified nuclear  
ROI

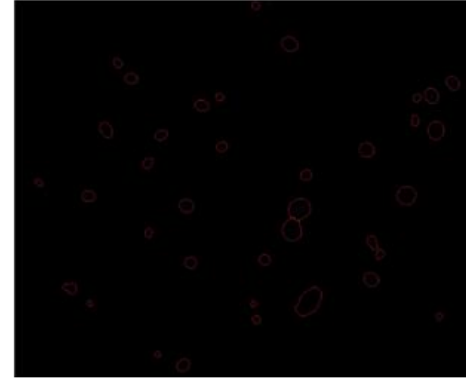

**Supplementary Figure 2. Identification of nuclear ROI using CellProfiler software for subsequent measurement of fluorescence intensity and determination of H<sub>2</sub>O<sub>2</sub> generation.**

**Supplementary Figure 3**

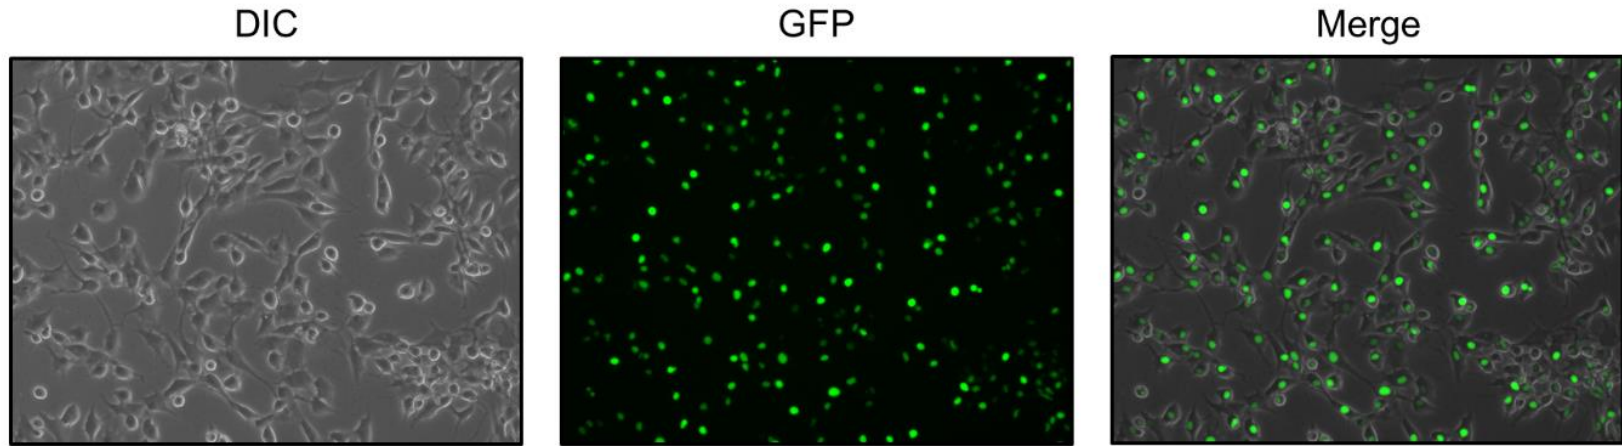

**Supplementary Figure 3. Expression and nuclear localization of NLS-HyPer-DAAO.** Human chondrocytes were transduced with the adenoviral vector encoding NLS-HyPer-DAAO for 48 hours and nuclear fluorescence was detected using an EVOS m5000 imaging system at 20x magnification.
